# Supplementary material for: Multi-Platform Next-Generation Sequencing of the Domestic Turkey (Meleagris gallopavo): Genome Assembly and Analysis
Source: PLoS Biol. 2010 Sep 7;8(9):e1000475. doi: 10.1371/journal.pbio.1000475 (PMC2935454; doi:10.1371/journal.pbio.1000475)
Supplement: Table S4 — Summary of gene family assignments. (0.03 MB DOC) [file pbio.1000475.s015.doc]

**Table S4.** Summary of gene family assignments.

|  | **Turkey** | **Chicken** |
| --- | --- | --- |
| Gene loci | 15093 | 16736 |
| Proteins | 16217 | 22194 |
| family | 8535 | 12188 |
| **In turkey** | | |
| Innovation family1 | | 485 |
| Extinction family2 | | 4138 |
| Expansion family3 | | 539 |
| Contraction family4 | | 780 |
| No change5 | | 6731 |

1Innovation family is the family found in turkey but not in chicken. 2Extinction family is the family found in chicken but not in turkey. 3Expansion: more members in turkey than in chicken. 4Contraction: more members in chicken than in turkey. 5No change: same number of members in chicken and turkey.
